# Supplementary material for: Isotope-labelling derivatisation: a broadly applicable approach to quantitation of algal toxins by isotope dilution LC-MS/MS
Source: Royal Society of Chemistry journal article supplement (doi:10.1039/c5ay03245h), 2016-01-01
Supplement: c5ay03245h1.pdf [file c5ay03245h1.pdf]

## Supplementary Information:

### Isotope-Labelled Derivatisation: A Broadly Applicable Approach to Quantitation of Algal Toxins by Isotope Dilution LC-MS/MS

Daniel G. Beach<sup>a,\*</sup>, Christie Hollingdale<sup>a,b</sup>, Michael A. Quilliam<sup>a,b</sup>

<sup>a</sup> Measurement Science and Standards, National Research Council Canada, Halifax, NS, Canada, B3H 3Z1

<sup>b</sup> Department of Chemistry, Dalhousie University, Halifax, NS, Canada, B3H 4R2

#### Isotope Dilution Calibration Plots:

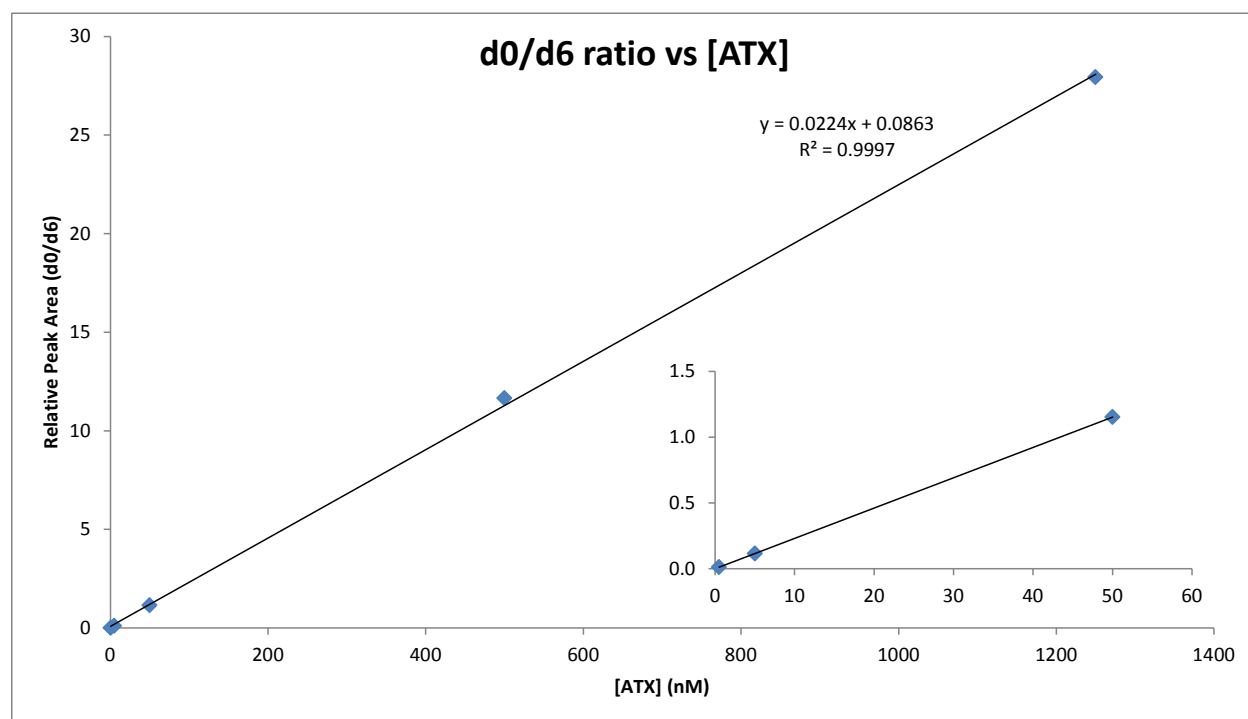

**Figure S1:** Isotope dilution calibration plot showing linearity of corrected DNS-ATX response over a broad concentration range in control algal extracts spiked with variable levels of DNS-ATX and 50 nM of d6-DNS-ATX. The inset shows an enlarged version of the three lowest level samples.

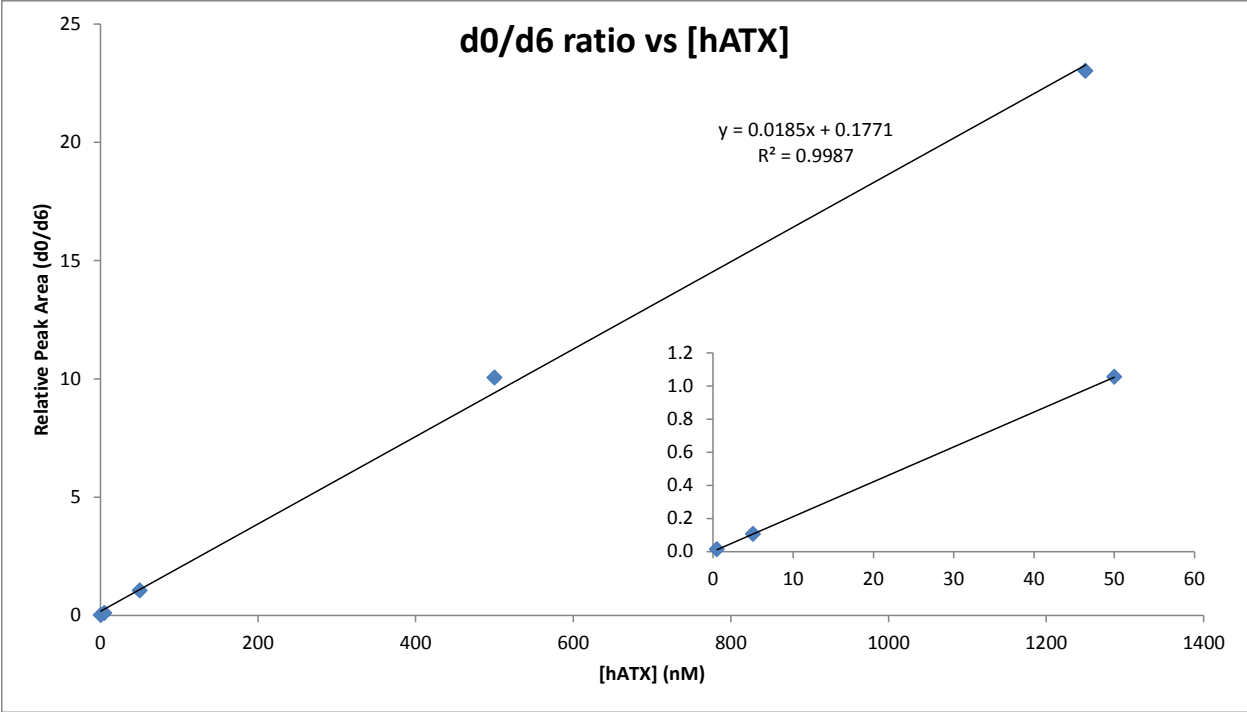

**Figure S2:** Isotope dilution calibration plot showing linearity of corrected DNS-hATX response over a broad concentration range in control algal extracts spiked with variable levels of DNS-hATX and 50 nM of d6-DNS-hATX. The inset shows an enlarged version of the three lowest level samples.

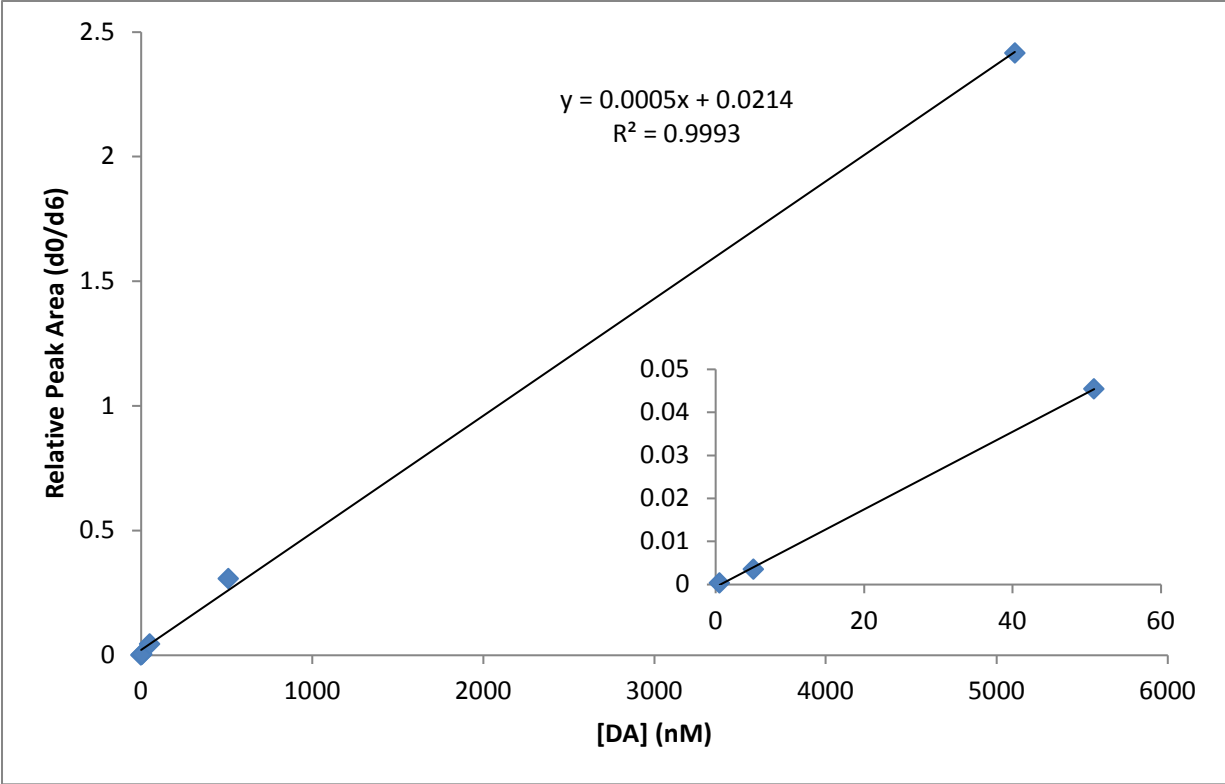

**Figure S3:** Isotope dilution calibration plot showing linearity of corrected DNS-DA response over a broad concentration range in control mussel extracts spiked with variable levels of DNS-DA and 2.4  $\mu\text{M}$  of d6-DNS-DA. The inset shows an enlarged version of the three lowest level samples.
